# Supplementary material for: Ethnicity influences the gut microbiota of individuals sharing a geographical location: a cross-sectional study from a middle-income country
Source: PubMed Central journal article supplement (PMC7846579; doi:10.1038/s41598-021-82311-3), 2021-01-29
Supplement: 41598_2021_82311_MOESM1_ESM.pdf [file 41598_2021_82311_MOESM1_ESM.pdf]

**Supplementary Information for:**

**Title: Ethnicity influences the gut microbiota of individuals sharing a geographical location: A cross-sectional study from a middle-income country**

**Running title:** gut microbiota of a Malaysian community

Dwiyanto, J<sup>1\*</sup>, Hussain, MH<sup>1</sup>, Reidpath, D<sup>2,3</sup>, Ong, KS<sup>1</sup>, Qasim, A<sup>1,4</sup>, Lee, SWH<sup>5</sup>, Lee, SM<sup>1</sup>, Foo, SC<sup>1</sup>, Chong, CW<sup>5</sup> & Rahman, S<sup>1,6\*</sup>

<sup>1</sup> School of Science, Monash University Malaysia, Bandar Sunway, Malaysia

<sup>2</sup> Health System and Population Studies Division, International Centre for Diarrhoeal Disease Research, Bangladesh, Dhaka, Bangladesh

<sup>3</sup> South East Asia Community Observatory, Segamat, Malaysia

<sup>4</sup> Genomics Facility, Monash University Malaysia, Bandar Sunway, Malaysia

<sup>5</sup> School of Pharmacy, Monash University Malaysia, Bandar Sunway, Malaysia

<sup>6</sup> Tropical Medicine and Biology Platform, Monash University Malaysia, Bandar Sunway, Malaysia

**Address for correspondence:**

Jacky Dwiyanto, email: [jacky.dwiyanto@monash.edu](mailto:jacky.dwiyanto@monash.edu)

Sadequr Rahman, email: [sadequr.rahman@monash.edu](mailto:sadequr.rahman@monash.edu)

School of Science, Monash University Malaysia, Jalan Lagoon Selatan, 47500 Bandar Sunway, Selangor Darul Ehsan, Malaysia

**Supplementary Table S1.** Age distribution of the study participant across ethnicity

| Ethnicity | 10-28 | 29-48 | 49-59 | 60-83 | Chi-square P-value |
|-----------|-------|-------|-------|-------|--------------------|
| Chinese   | 12    | 7     | 23    | 23    | 0.01               |
| Indian    | 7     | 18    | 12    | 12    | 0.17               |
| Jakun     | 22    | 20    | 6     | 6     | 0.00               |
| Malay     | 13    | 10    | 10    | 13    | 0.85               |

**Supplementary Table S2.** Lifestyle factors obtained from Segamat community participants

| Category           | Factors               | PERMANOVA   |      | Level               | Chinese |      | Jakun |      | Indian |      | Malay |      | N    | Chi Sq  |
|--------------------|-----------------------|-------------|------|---------------------|---------|------|-------|------|--------|------|-------|------|------|---------|
|                    |                       | Effect size | P    |                     | n       | %    | n     | %    | n      | %    | n     | %    |      | P-value |
| Dietary preference | Ulam                  | 0.01        | 0.01 | No                  | 42      | 0.47 | 10    | 0.11 | 26     | 0.29 | 11    | 0.12 | 89   | 0.00    |
|                    |                       |             |      | Yes                 | 23      | 0.18 | 44    | 0.35 | 23     | 0.18 | 35    | 0.28 | 125  | 0.02    |
|                    | Pork                  | 0.01        | 0.01 | No                  | 4       | 0.03 | 37    | 0.28 | 45     | 0.34 | 46    | 0.35 | 132  | 0.00    |
|                    |                       |             |      | Yes                 | 61      | 0.74 | 17    | 0.21 | 4      | 0.05 | 0     | 0.00 | 82   | 0.00    |
|                    | Beef                  | 0.01        | 0.01 | No                  | 57      | 0.42 | 27    | 0.20 | 42     | 0.31 | 11    | 0.08 | 137  | 0.00    |
|                    |                       |             |      | Yes                 | 8       | 0.10 | 27    | 0.35 | 7      | 0.09 | 35    | 0.45 | 77   | 0.00    |
|                    | Chicken               | 0.00        | 0.40 | No                  | 3       | 0.16 | 6     | 0.32 | 6      | 0.32 | 4     | 0.21 | 19   | 0.70    |
|                    |                       |             |      | Yes                 | 62      | 0.32 | 48    | 0.25 | 43     | 0.22 | 42    | 0.22 | 195  | 0.16    |
|                    | Fish                  | 0.01        | 0.04 | No                  | 6       | 0.22 | 16    | 0.59 | 4      | 0.15 | 1     | 0.04 | 27   | 0.00    |
|                    |                       |             |      | Yes                 | 59      | 0.32 | 38    | 0.20 | 45     | 0.24 | 45    | 0.24 | 187  | 0.17    |
|                    | Raw food              | 0.01        | 0.06 | No                  | 64      | 0.32 | 49    | 0.25 | 39     | 0.19 | 46    | 0.23 | 198  | 0.08    |
|                    |                       |             |      | Yes                 | 1       | 0.06 | 5     | 0.31 | 10     | 0.63 | 0     | 0.00 | 16   | 0.00    |
|                    | Probiotics            | 0.01        | 0.21 | No                  | 42      | 0.27 | 36    | 0.23 | 33     | 0.21 | 43    | 0.28 | 154  | 0.62    |
|                    |                       |             |      | Yes                 | 21      | 0.36 | 18    | 0.31 | 16     | 0.28 | 3     | 0.05 | 58   | 0.00    |
|                    | Fermented food        | 0.01        | 0.15 | No                  | 5       | 0.14 | 10    | 0.29 | 16     | 0.46 | 4     | 0.11 | 35   | 0.02    |
|                    |                       |             |      | Yes                 | 56      | 0.32 | 42    | 0.24 | 33     | 0.32 | 42    | 0.24 | 173  | 0.09    |
|                    | Fruits                | 0.01        | 0.13 | No                  | 6       | 0.26 | 13    | 0.57 | 0      | 0.00 | 4     | 0.17 | 23   | 0.00    |
|                    |                       |             |      | Yes                 | 57      | 0.31 | 41    | 0.23 | 45     | 0.25 | 39    | 0.21 | 182  | 0.23    |
|                    | Coffee                | 0.01        | 0.20 | No                  | 29      | 0.26 | 31    | 0.28 | 22     | 0.20 | 27    | 0.25 | 109  | 0.65    |
|                    |                       |             |      | Yes                 | 32      | 0.32 | 23    | 0.23 | 27     | 0.27 | 19    | 0.19 | 101  | 0.29    |
| Tea                | 0.01                  | 0.09        | No   | 29                  | 0.30    | 20   | 0.21  | 27   | 0.28   | 20   | 0.21  | 96   | 0.43 |         |
|                    |                       |             | Yes  | 32                  | 0.28    | 34   | 0.29  | 22   | 0.19   | 26   | 0.23  | 114  | 0.36 |         |
| Hygiene            | Toilet type           | 0.04        | 0.00 | Flush – sewerage    | 34      | 0.44 | 5     | 0.06 | 25     | 0.32 | 14    | 0.18 | 78   | 0.00    |
|                    |                       |             |      | Flush - septic tank | 31      | 0.31 | 17    | 0.17 | 22     | 0.22 | 30    | 0.30 | 100  | 0.15    |
|                    |                       |             |      | Pourflush           | 0       | 0.00 | 6     | 1.00 | 0      | 0.00 | 0     | 0.00 | 6    | 0.00    |
|                    |                       |             |      | Borehole            | 0       | 0.00 | 19    | 0.83 | 2      | 0.09 | 2     | 0.09 | 23   | 0.00    |
|                    |                       |             |      | Bucket latrine      | 0       | 0.00 | 4     | 1.00 | 0      | 0.00 | 0     | 0.00 | 4    | 0.01    |
|                    |                       |             |      | Others              | 0       | 0.00 | 3     | 1.00 | 0      | 0.00 | 0     | 0.00 | 3    | 0.03    |
|                    | Toilet nature         | 0.02        | 0.00 | Squat               | 7       | 0.09 | 50    | 0.61 | 19     | 0.23 | 6     | 0.07 | 82   | 0.00    |
|                    |                       |             |      | Sit                 | 25      | 0.43 | 0     | 0.00 | 21     | 0.36 | 12    | 0.21 | 58   | 0.00    |
|                    |                       |             |      | Both                | 33      | 0.45 | 4     | 0.05 | 9      | 0.12 | 28    | 0.38 | 74   | 0.00    |
|                    | Toilet location       | 0.01        | 0.46 | Inside              | 61      | 0.34 | 38    | 0.21 | 47     | 0.26 | 32    | 0.18 | 178  | 0.01    |
|                    |                       |             |      | Outside             | 2       | 0.08 | 13    | 0.50 | 2      | 0.08 | 9     | 0.35 | 26   | 0.00    |
|                    |                       |             |      | Both                | 2       | 0.20 | 3     | 0.30 | 0      | 0.00 | 5     | 0.50 | 10   | 0.16    |
|                    | Bathing water source  | 0.02        | 0.00 | Piped               | 65      | 0.34 | 30    | 0.16 | 49     | 0.26 | 46    | 0.24 | 190  | 0.00    |
|                    |                       |             |      | Pond/Stream         | 0       | 0.00 | 16    | 1.00 | 0      | 0.00 | 0     | 0.00 | 16   | 0.00    |
|                    |                       |             |      | Others              | 0       | 0.00 | 8     | 1.00 | 0      | 0.00 | 0     | 0.00 | 8    | 0.00    |
|                    | Drinking water source | 0.03        | 0.00 | Indoor piped        | 65      | 0.35 | 28    | 0.15 | 48     | 0.26 | 46    | 0.25 | 187  | 0.00    |
|                    |                       |             |      | Piped in yard       | 0       | 0.00 | 0     | 0.00 | 1      | 1.00 | 0     | 0.00 | 1    | 0.39    |
|                    |                       |             |      | Bottled             | 0       | 0.00 | 2     | 1.00 | 0      | 0.00 | 0     | 0.00 | 2    | 0.11    |
|                    |                       |             |      | Pond/Stream         | 0       | 0.00 | 15    | 1.00 | 0      | 0.00 | 0     | 0.00 | 15   | 0.00    |
|                    |                       |             |      | Others              | 0       | 0.00 | 9     | 1.00 | 0      | 0.00 | 0     | 0.00 | 9    | 0.00    |

|                                   |                     |      |      |                             |      |      |      |      |      |      |      |      |      |      |
|-----------------------------------|---------------------|------|------|-----------------------------|------|------|------|------|------|------|------|------|------|------|
| Health condition                  | Handwashing         | 0.03 | 0.00 | Never                       | 21   | 0.95 | 1    | 0.05 | 0    | 0.00 | 0    | 0.00 | 22   | 0.00 |
|                                   |                     |      |      | Sometimes                   | 11   | 0.85 | 1    | 0.08 | 1    | 0.08 | 0    | 0.00 | 13   | 0.00 |
|                                   |                     |      |      | Usually                     | 12   | 0.27 | 12   | 0.27 | 9    | 0.20 | 12   | 0.27 | 45   | 0.90 |
|                                   |                     |      |      | Half of the time            | 5    | 0.83 | 1    | 0.17 | 0    | 0.00 | 0    | 0.00 | 6    | 0.01 |
|                                   |                     |      |      | Always                      | 16   | 0.13 | 39   | 0.30 | 39   | 0.30 | 34   | 0.27 | 128  | 0.01 |
|                                   | Utensil preference  | 0.03 | 0.00 | Barehand                    | 1    | 0.01 | 40   | 0.36 | 36   | 0.32 | 34   | 0.31 | 111  | 0.00 |
|                                   |                     |      |      | Yes                         | 61   | 0.88 | 7    | 0.10 | 1    | 0.01 | 0    | 0.00 | 69   | 0.00 |
|                                   |                     |      |      | Both                        | 3    | 0.09 | 6    | 0.18 | 12   | 0.36 | 12   | 0.36 | 33   | 0.06 |
|                                   |                     |      |      | Blank data                  | 0    | 0.00 | 1    | 1.00 | 0    | 0.00 | 0    | 0.00 | 1    | 0.39 |
|                                   | Allergy             | 0.00 | 0.43 | No                          | 59   | 0.35 | 40   | 0.24 | 36   | 0.21 | 34   | 0.20 | 169  | 0.03 |
|                                   |                     |      |      | Yes                         | 6    | 0.13 | 14   | 0.31 | 13   | 0.29 | 12   | 0.27 | 45   | 0.33 |
|                                   | Cigarette           | 0.00 | 0.41 | No                          | 58   | 0.33 | 40   | 0.23 | 39   | 0.22 | 37   | 0.21 | 174  | 0.09 |
|                                   |                     |      |      | Yes                         | 7    | 0.18 | 14   | 0.35 | 10   | 0.25 | 9    | 0.23 | 40   | 0.46 |
|                                   | Blood pressure      | 0.02 | 0.43 | Normal (<120/80)            | 26   | 0.35 | 15   | 0.20 | 18   | 0.24 | 15   | 0.20 | 74   | 0.22 |
|                                   |                     |      |      | Elevated (120 – 129/<80)    | 14   | 0.36 | 9    | 0.23 | 9    | 0.23 | 7    | 0.18 | 39   | 0.43 |
|                                   |                     |      |      | Stage 1 (130 – 139/80 – 89) | 10   | 0.22 | 15   | 0.33 | 10   | 0.22 | 10   | 0.22 | 45   | 0.64 |
|                                   |                     |      |      | Stage 2 (≥140/90)           | 15   | 0.28 | 13   | 0.25 | 12   | 0.23 | 13   | 0.25 | 53   | 0.95 |
|                                   |                     |      |      | Crisis (≥180/120)           | 0    | 0.00 | 2    | 0.67 | 0    | 0.00 | 1    | 0.33 | 3    | 0.30 |
|                                   |                     |      |      | Hypertensive (>129/>79)     | 25   | 0.25 | 30   | 0.30 | 22   | 0.22 | 24   | 0.24 | 101  | 0.71 |
|                                   | Body mass index     | 0.02 | 0.08 | Underweight (<18.5)         | 6    | 0.27 | 8    | 0.36 | 2    | 0.09 | 6    | 0.27 | 22   | 0.33 |
|                                   |                     |      |      | Healthy (18.5 – 24.99)      | 38   | 0.40 | 23   | 0.24 | 13   | 0.14 | 20   | 0.21 | 94   | 0.00 |
|                                   |                     |      |      | Overweight (25 – 29.99)     | 15   | 0.27 | 10   | 0.18 | 19   | 0.35 | 11   | 0.20 | 55   | 0.30 |
|                                   |                     |      |      | Obese (>30)                 | 6    | 0.14 | 13   | 0.30 | 15   | 0.35 | 9    | 0.21 | 43   | 0.21 |
|                                   | Medication          | 0.01 | 0.00 | No                          | 38   | 0.27 | 42   | 0.30 | 26   | 0.18 | 35   | 0.25 | 141  | 0.27 |
|                                   |                     |      |      | Yes                         | 27   | 0.37 | 12   | 0.16 | 23   | 0.32 | 11   | 0.15 | 73   | 0.02 |
|                                   | Any chronic disease | 0.01 | 0.02 | No                          | 39   | 0.28 | 38   | 0.27 | 27   | 0.19 | 35   | 0.25 | 139  | 0.47 |
|                                   |                     |      |      | Yes                         | 26   | 0.35 | 16   | 0.21 | 22   | 0.29 | 11   | 0.15 | 75   | 0.07 |
| Diabetes                          | 0.01                | 0.01 | No   | 59                          | 0.31 | 52   | 0.28 | 34   | 0.18 | 43   | 0.23 | 188  | 0.06 |      |
|                                   |                     |      | Yes  | 6                           | 0.23 | 2    | 0.08 | 15   | 0.58 | 3    | 0.12 | 26   | 0.00 |      |
| Cholesterol                       | 0.00                | 0.37 | No   | 52                          | 0.28 | 52   | 0.28 | 40   | 0.21 | 43   | 0.23 | 187  | 0.48 |      |
|                                   |                     |      | Yes  | 13                          | 0.48 | 2    | 0.07 | 9    | 0.33 | 3    | 0.11 | 27   | 0.01 |      |
| BSS Scale                         | 0.01                | 0.00 | 1    | 1                           | 0.11 | 6    | 0.67 | 1    | 0.11 | 1    | 0.11 | 9    | 0.04 |      |
|                                   |                     |      | 2    | 10                          | 0.31 | 4    | 0.13 | 9    | 0.28 | 9    | 0.28 | 32   | 0.43 |      |
|                                   |                     |      | 3    | 11                          | 0.17 | 22   | 0.35 | 20   | 0.32 | 10   | 0.16 | 63   | 0.07 |      |
|                                   |                     |      | 4    | 21                          | 0.43 | 9    | 0.18 | 7    | 0.14 | 12   | 0.24 | 49   | 0.02 |      |
|                                   |                     |      | 5    | 10                          | 0.40 | 6    | 0.24 | 2    | 0.08 | 7    | 0.28 | 25   | 0.16 |      |
|                                   |                     |      | 6    | 7                           | 0.29 | 6    | 0.25 | 8    | 0.33 | 3    | 0.13 | 24   | 0.51 |      |
|                                   |                     |      | 7    | 5                           | 0.42 | 1    | 0.08 | 2    | 0.17 | 4    | 0.33 | 12   | 0.34 |      |
| Surgical history                  | 0.01                | 0.15 | No   | 65                          | 0.32 | 52   | 0.25 | 45   | 0.22 | 44   | 0.21 | 206  | 0.14 |      |
|                                   |                     |      | Yes  | 3                           | 0.27 | 2    | 0.18 | 4    | 0.36 | 2    | 0.18 | 11   | 0.80 |      |
| Family history of chronic disease | Any chronic disease | 0.00 | 0.36 | No                          | 24   | 0.35 | 15   | 0.22 | 16   | 0.23 | 14   | 0.20 | 69   | 0.30 |
|                                   |                     |      |      | Yes                         | 41   | 0.28 | 39   | 0.27 | 33   | 0.23 | 32   | 0.22 | 145  | 0.65 |
|                                   | Diabetes            | 0.00 | 0.47 | No                          | 43   | 0.31 | 41   | 0.30 | 24   | 0.18 | 29   | 0.21 | 137  | 0.06 |

|                               |      |      |        |    |      |    |      |    |      |    |      |     |      |
|-------------------------------|------|------|--------|----|------|----|------|----|------|----|------|-----|------|
|                               | 0.00 | 0.72 | Yes    | 22 | 0.29 | 13 | 0.17 | 25 | 0.32 | 17 | 0.22 | 77  | 0.22 |
| Hypertension                  | 0.00 | 0.65 | No     | 34 | 0.31 | 23 | 0.21 | 29 | 0.27 | 22 | 0.20 | 108 | 0.32 |
|                               |      |      | Yes    | 31 | 0.29 | 31 | 0.29 | 20 | 0.19 | 24 | 0.23 | 106 | 0.34 |
| Cholesterol                   | 0.00 | 0.46 | No     | 55 | 0.29 | 48 | 0.26 | 44 | 0.23 | 41 | 0.22 | 188 | 0.50 |
|                               |      |      | Yes    | 10 | 0.38 | 6  | 0.23 | 5  | 0.19 | 5  | 0.19 | 26  | 0.45 |
| Other chronic conditions      | 0.00 | 0.91 | No     | 55 | 0.29 | 43 | 0.23 | 46 | 0.24 | 44 | 0.23 | 188 | 0.59 |
|                               |      |      | Yes    | 10 | 0.38 | 11 | 0.42 | 3  | 0.12 | 2  | 0.08 | 26  | 0.02 |
| Other Proximity to animals    | 0.01 | 0.23 | No     | 35 | 0.38 | 17 | 0.18 | 19 | 0.20 | 22 | 0.24 | 93  | 0.04 |
|                               |      |      | Yes    | 30 | 0.25 | 37 | 0.31 | 30 | 0.25 | 24 | 0.20 | 121 | 0.42 |
| Number of people in household | 0.02 | 0.07 | 1 – 3  | 18 | 0.29 | 13 | 0.21 | 20 | 0.32 | 11 | 0.18 | 62  | 0.33 |
|                               |      |      | 4 – 5  | 20 | 0.24 | 22 | 0.27 | 17 | 0.20 | 24 | 0.29 | 83  | 0.73 |
|                               |      |      | 6      | 10 | 0.29 | 11 | 0.32 | 5  | 0.15 | 8  | 0.24 | 34  | 0.48 |
|                               |      |      | 7 – 16 | 17 | 0.49 | 8  | 0.23 | 7  | 0.20 | 3  | 0.09 | 35  | 0.01 |
| Healthy group                 | 0.10 | 0.00 | No     | 51 | 0.31 | 41 | 0.25 | 39 | 0.23 | 36 | 0.22 | 167 | 0.39 |
|                               |      |      | Yes    | 14 | 0.30 | 13 | 0.28 | 10 | 0.21 | 10 | 0.21 | 47  | 0.78 |

Blood pressure was categorized using categories based on the American Heart Association (<https://www.heart.org/en/health-topics/high-blood-pressure/understanding-blood-pressure-readings>)

Body mass index was categorized using categories based on Malaysia Ministry of Health classification (<http://www.myhealth.gov.my/en/bmi/>)

**Supplementary Table S3.** Criteria used for selecting healthy participants

| <b>Factor</b>       | <b>Value</b>                             |
|---------------------|------------------------------------------|
| Age                 | >10                                      |
| BMI                 | 16-30 (Underweight – Overweight)         |
| BP                  | Lower than 140/90 (Stage 1)              |
| Blood sugar         | Not measured                             |
| Drug                | No current drug intake                   |
| Surgery             | No surgical history in the past one year |
| Bristol Stool Scale | Between 3 and 5                          |
| Disease             | No reported chronic condition            |

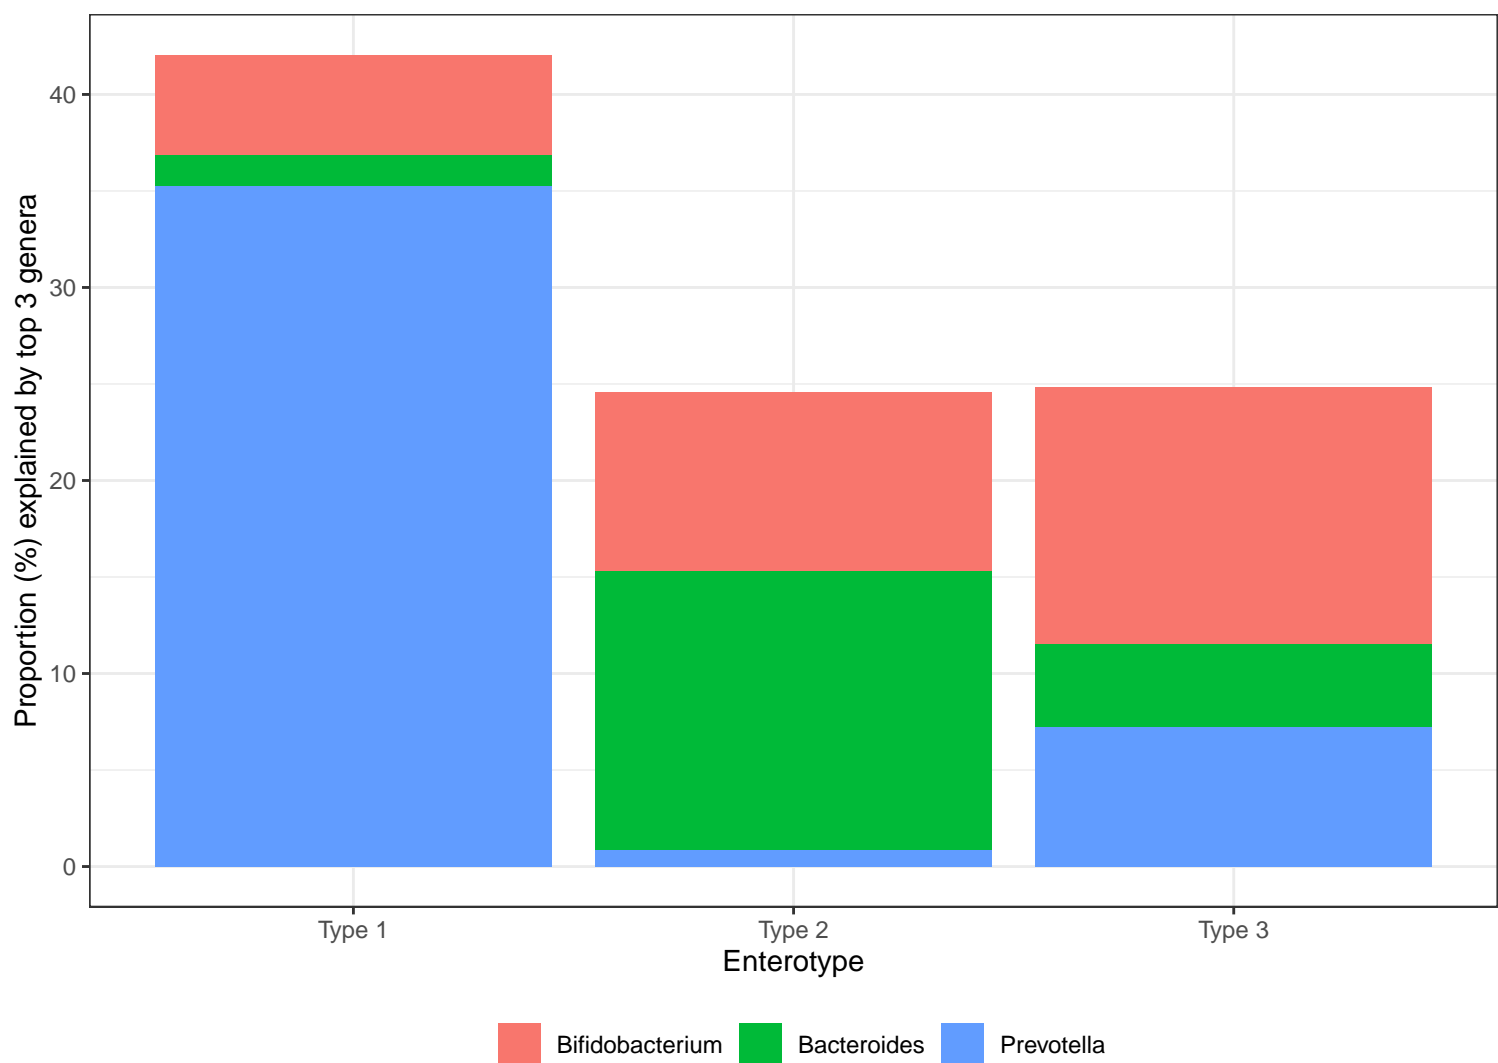

Supplementary Figure S1. Proportion of the top 3 genera of each enterotype detected based on Dirichlet Multinomial Analysis
